# Supplementary material
Source: PubMed Central journal article supplement (PMC4472004)

Figure S1: (A) HPLC chromatography of PSMA-1. PSMA-1 has a retention time at 18.6 min. (B) MALDI-TOF mass spectrum of PSMA-1 with  $M+1=1087.5$ .

Figure S2: (A) HPLC chromatography of PSMA-1-IR800. PSMA-1-IR800 has a retention time at 23.4 min. (B) MALDI-TOF mass spectrum of PSMA-1-IR800, which shows  $M+1=2071.8$ .

Figure S3: (A) HPLC chromatography of PSMA-1-Cy5.5. PSMA-1-Cy5.5 has a retention time at 39.4 min. (B) MALDI-TOF mass spectrum of PSMA-1-Cy5.5, which shows  $M+1=1651.7$ .

Figure S4: Comparison of the quantification of PC3pip tumor uptake of PSMA-1-IR800 and PSMA-1-Cy5.5 as determined by FMT. The amount of PSMA-1-IR800 in PC3pip reached a maximum at 4 hours post injection, then dropped gradually. The amount of PSMA-1-Cy5.5 reached highest at 24 hours post injection, then remained constant.

Figure S1

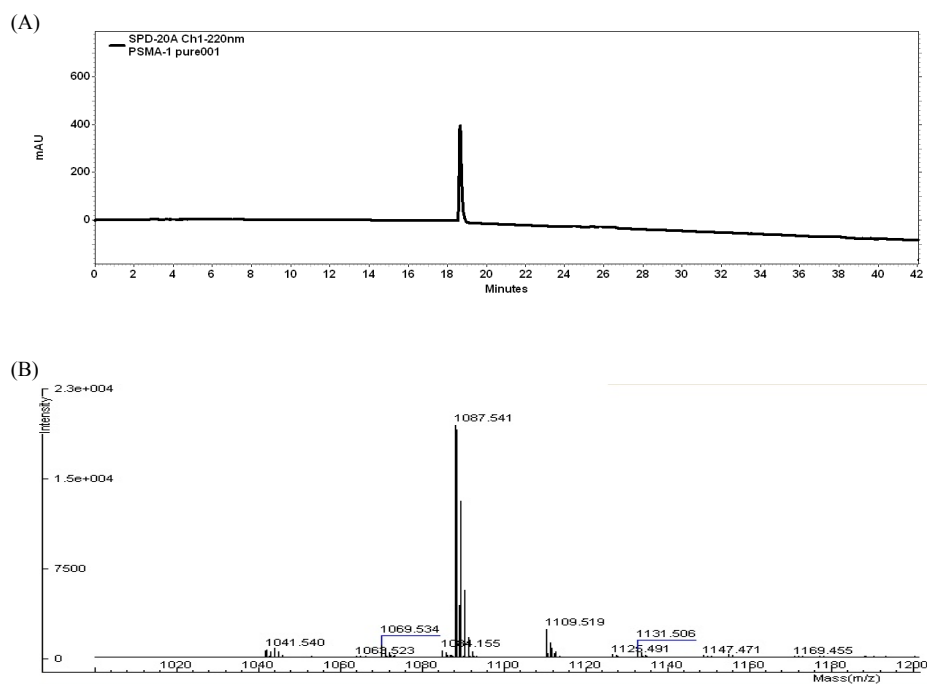

Figure S2

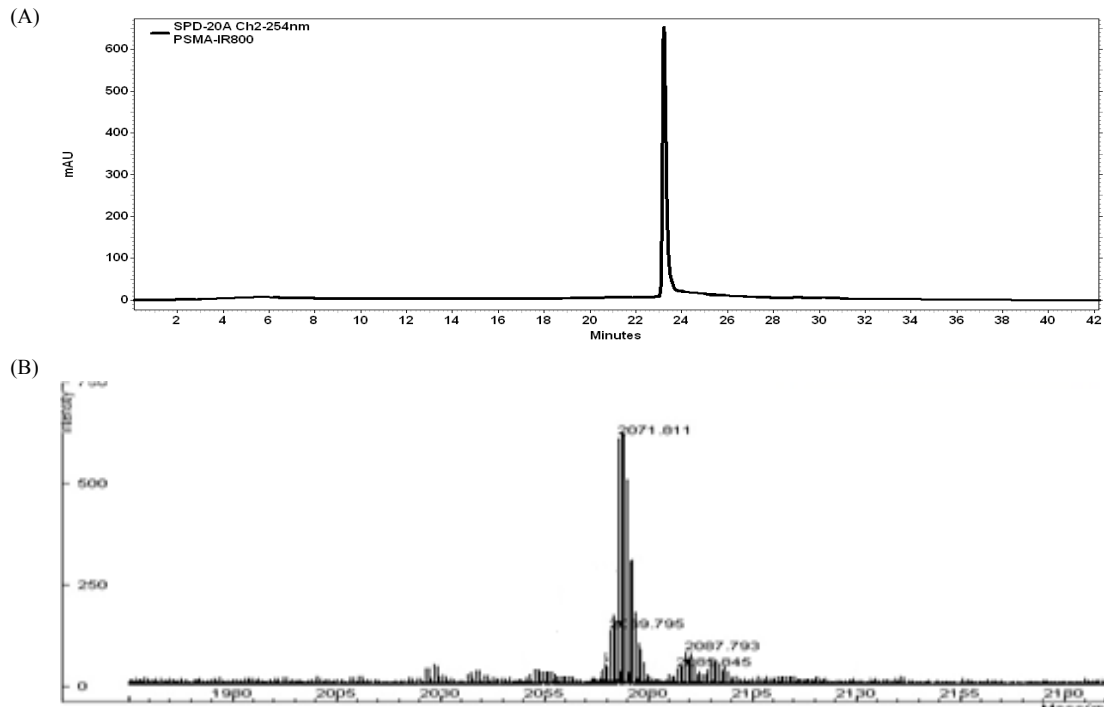

Figure S3

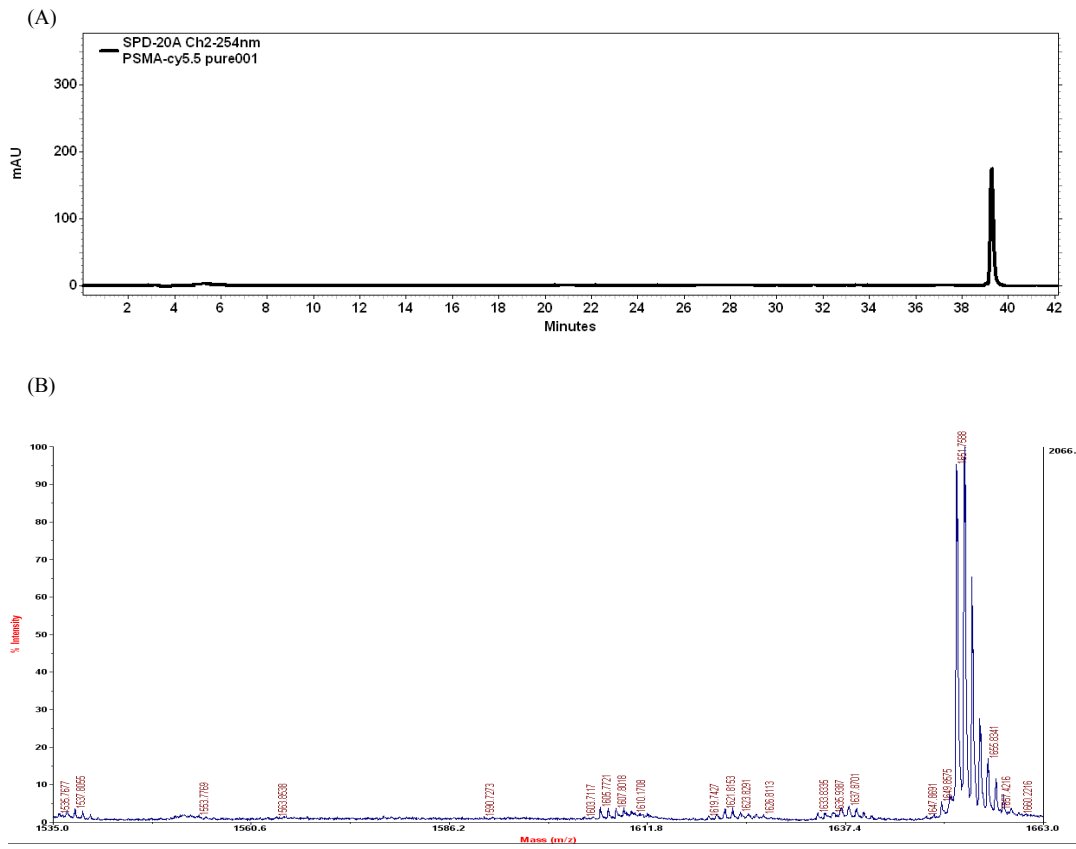

Figure S4

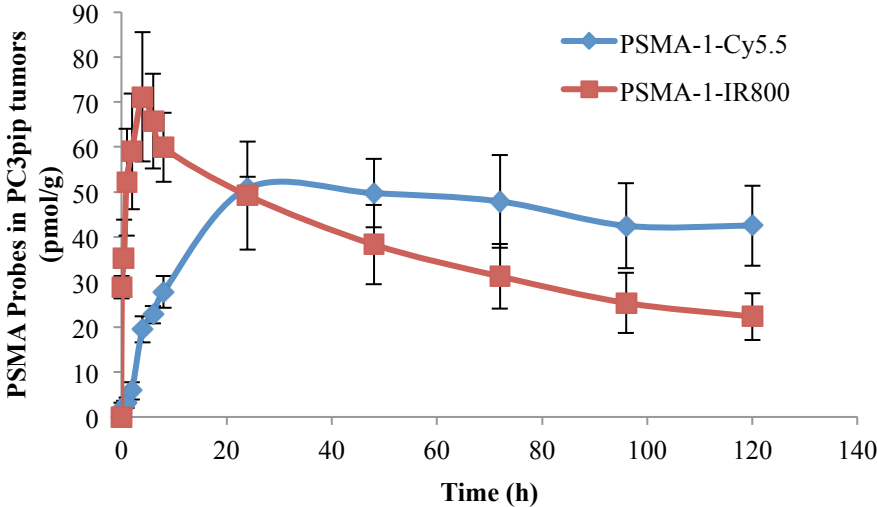

Supplement: NIHMS694506-supplement-supplemental_information.pdf [file NIHMS694506-supplement-supplemental_information.pdf]
